# Supplementary material for: A Phenomenological Approach to Study Mechanical Properties of Polymeric Porous Structures Processed Using Supercritical CO2
Source: MDPI journal article supplement (doi:10.3390/polym11030485), 2019-03-13
Supplement: s1 [file s1]

## Supplementary material

### S.1. Equations for models development

The strain invariants can be expressed in terms of the stretch ratios  $\lambda_1, \lambda_2, \lambda_3$  (eq. 1, 2 and 3) [1]:

$$I_1 = \lambda_1^2 + \lambda_2^2 + \lambda_3^2 \quad (1)$$

$$I_2 = \lambda_1^2 \cdot \lambda_2^2 + \lambda_2^2 \cdot \lambda_3^2 + \lambda_3^2 \cdot \lambda_1^2 \quad (2)$$

$$I_3 = \lambda_1^2 \cdot \lambda_2^2 \cdot \lambda_3^2 \quad (3)$$

In our case, despite the fact that the CA/GO material is porous, as a first approximation, both polymeric mixtures were considered as incompressible; therefore,  $I_3$  can be calculated as [1]:

$$I_3 = \lambda_1^2 \cdot \lambda_2^2 \cdot \lambda_3^2 = 1 \quad (4)$$

For uniaxial mechanical tests, it is possible to define the different stretch ratios ( $\lambda_1, \lambda_2, \lambda_3$ ) in terms of the parallel stretch  $\lambda$  [1].

For a tensile test (eq. 5, 6 and 7) the main stretch is  $\lambda_1$  (x axis):

$$\lambda_1 = \lambda \quad (5)$$

$$\lambda_2 = \lambda_3 \quad (6)$$

$$\lambda_2 = \lambda_3 = \lambda^{1/2} \quad (7)$$

Whereas, for a compression tests (eq. 8, 9 and 10) the main stretch is  $\lambda_2$  (y axis):

$$\lambda_2 = \lambda \quad (8)$$

$$\lambda_1 = \lambda_3 \quad (9)$$

$$\lambda_1 = \lambda_3 = \lambda^{1/2} \quad (10)$$

## S.2. Equation for determining the average absolute relative deviation

$$AARD (\%) = \frac{100}{n} \cdot \sum \frac{\sigma_E^{calculated} - \sigma_E^{experimental}}{\sigma_E^{experimental}} \quad (11)$$

1. Treloar, L.R.G. The elasticity and related properties of rubbers. *Rep. Prog. Phys.* **1973**, 36, 755–826.
